# Supplementary material for: AI-Generated Draft Replies Integrated Into Health Records and Physicians’ Electronic Communication
Source: PubMed Central journal article supplement (PMC11019394; doi:10.1001/jamanetworkopen.2024.6565), 2024-04-15
Supplement: jamanetwopen-e246565-s002.pdf [file jamanetwopen-e246565-s002.pdf]

## Data Sharing Statement

Tai-Seale. AI-Generated Draft Replies Integrated Into Health Records and Physicians' Electronic Communication. *JAMA Netw Open*. Published April 15, 2024.  
doi:10.1001/jamanetworkopen.2024.6565

### Data

**Data available:** No
